# Supplementary material
Source: PubMed Central journal article supplement (PMC518765)
Supplement: pnas_101_38_13861__1.pdf [file pnas_101_38_13861__1.pdf]

Table 2. Oligonucleotide sequences of the primers used for RT-PCR

| Names                | Predicted Size (bp) | Sense/Antisense                                                         | Location (nt.)         |
|----------------------|---------------------|-------------------------------------------------------------------------|------------------------|
| TRPC1<br>(U31110)*   | 372                 | 5'-CAAGATTTTGGAAAATTTCTTG-3'/<br>5'-TTGTCTTCATGATTTGCTAT-3'             | 2338-2359<br>2689-2709 |
| TRPC3<br>(Y13758)*   | 318                 | 5'-TGACTTCCGTTGTGCTCAAATATG-3'/<br>5'-CCTTCTGAAGCCTTCTCCTTCTGC-3'       | 2316-2339<br>2610-2633 |
| TRPC4<br>(AF063822)* | 415                 | 5'-TCTGCAAATATCTCTGGGAAGAATGC-3'/<br>5'-AAGCTTTGTTCTGTGCAAATTTCCATTC-3' | 1747-1772<br>2135-2161 |
| TRPC5<br>(AF054568)* | 501                 | 5'-GTGGAGTGTGTGTCTAGTTCAG-3'/<br>5'-AGACAGCATGGGAAACAGGAAC-3'           | 1453-1474<br>1932-1953 |
| TRPC6<br>(AF080394)* | 438                 | 5'-CTTGAGGAGGGCAGAACACTT-3'/<br>5'-AGGAGTTCATAGCGGAGACTTG -3'           | 2276-2297<br>2692-2713 |
| TRPC6<br>(AF080394)* | 326                 | 5'-AGTCCGGCTTACCTGTCATTGT-3'/<br>5'-AGGAGTTCATAGCGGAGACTTG-3'           | 861-882<br>1165-1186   |
| TRPC7<br>(AJ272034)* | 365                 | 5'-GGATGCAGATGTGGAATGGAAG-3'/<br>5'-CGTCATTTTCTCTGTCCACCTG-3'           | 2043-2064<br>2386-2407 |
| GAPDH<br>(M33197)*   | 550                 | 5'-CTTTGGTATCGTGGAAGGACTC-3'/<br>5'-TCTTCTCTTGTGCTCTTGCTG-3'            | 561-582<br>1089-1110   |

\*GenBank accession numbers.
